# Supplementary figures and images for: Development of an individual fitness score (IFS) based on the depression treatment guidelines of in the Japanese Society of Mood Disorders
Source: PubMed Central journal article supplement — Neuropsychopharmacol Rep. 2022 Nov 16;43(1):33–9. doi: 10.1002/npr2.12301 (PMC10009429; doi:10.1002/npr2.12301), 2022-11-16

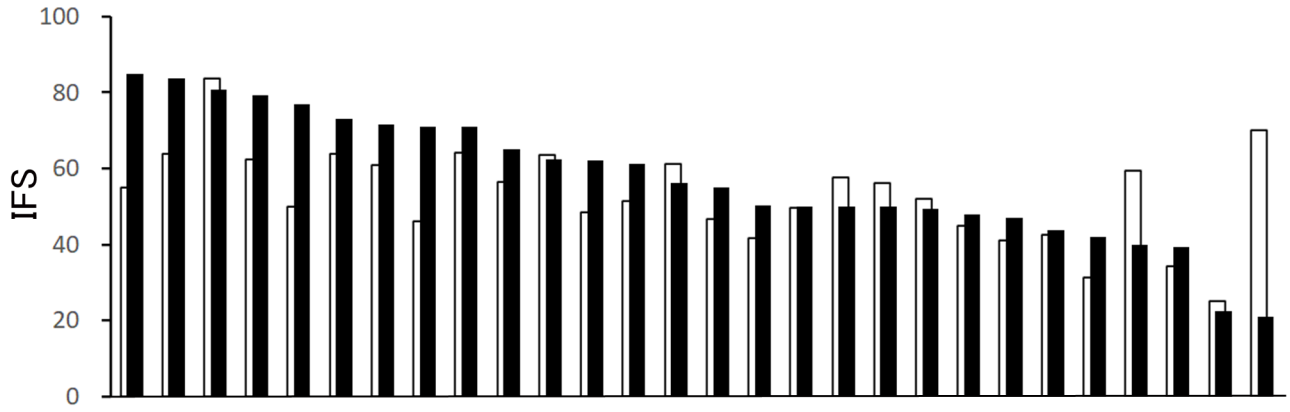

Supplementary Figure 1

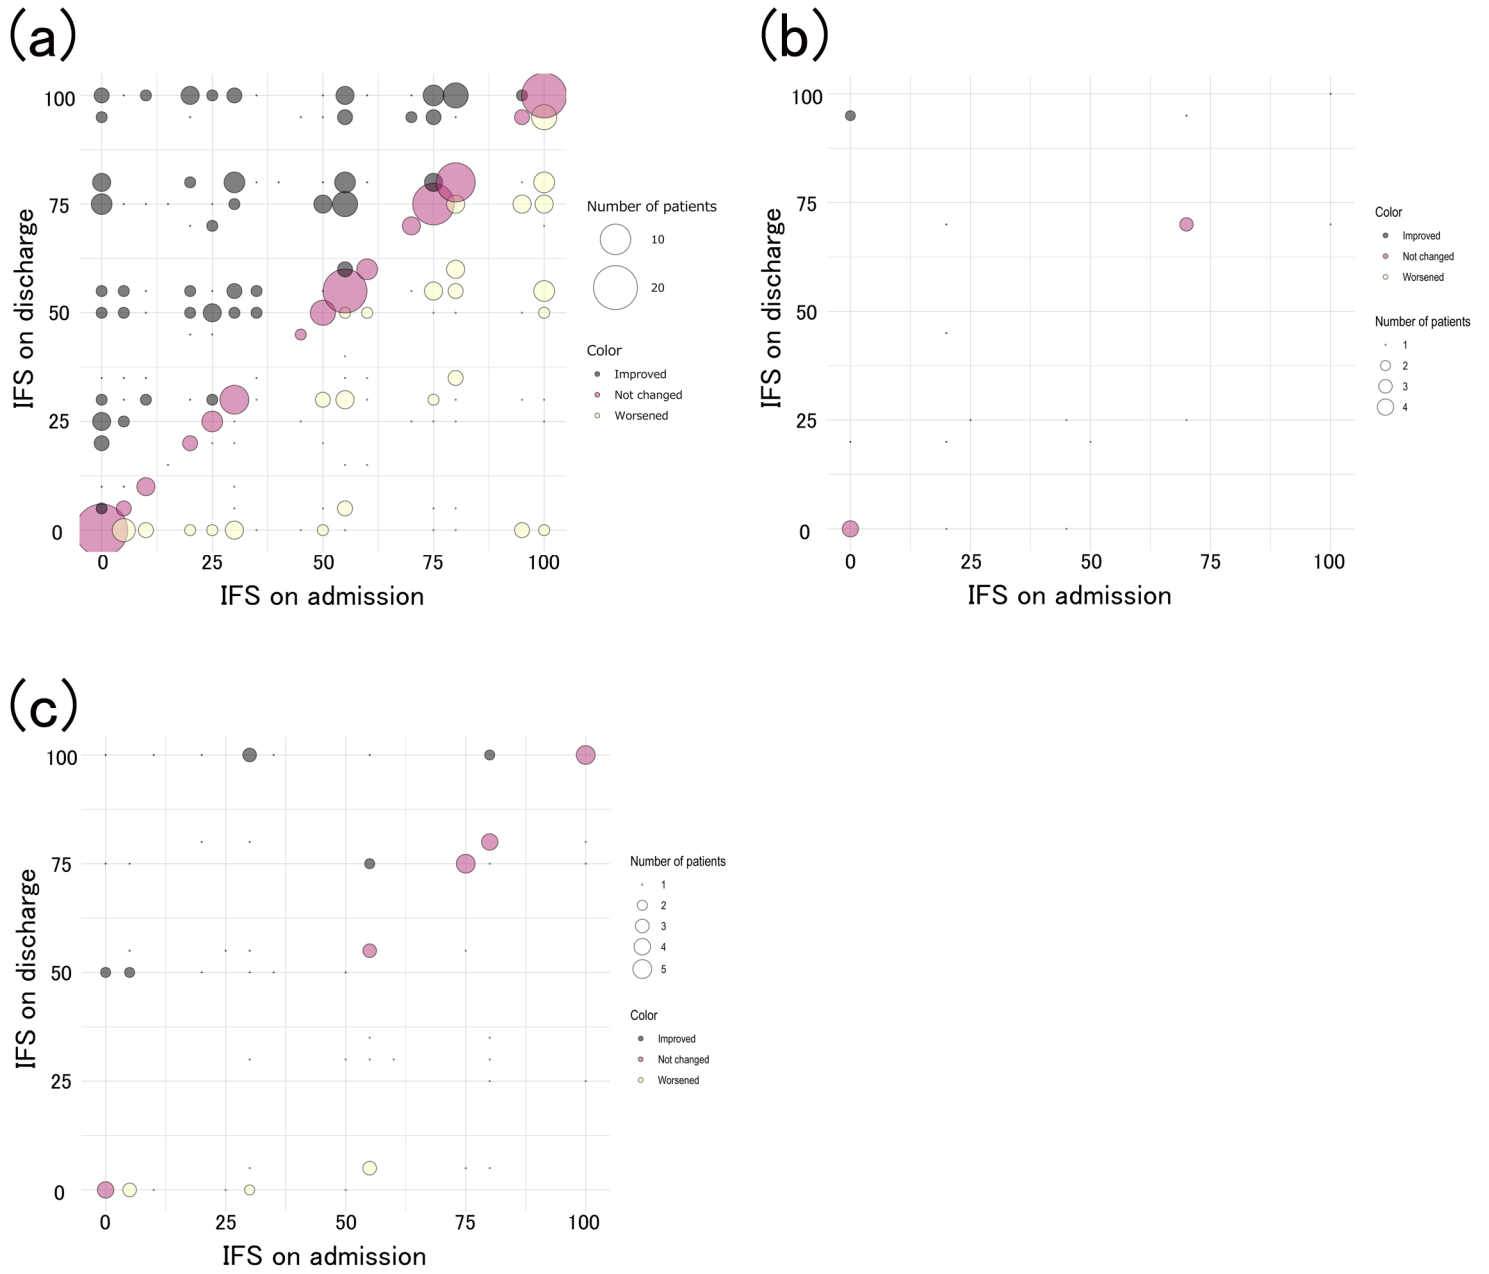

Supplementary figure 2

Supplement: NPR2-43-33-s002.pdf [file NPR2-43-33-s002.pdf]
